# Supplementary material for: Direct cell extraction of membrane proteins for structure–function analysis
Source: PubMed Central journal article supplement (PMC9876986; doi:10.1038/s41598-023-28455-w), 2023-01-25
Supplement: 41598_2023_28455_MOESM1_ESM.pdf [file 41598_2023_28455_MOESM1_ESM.pdf]

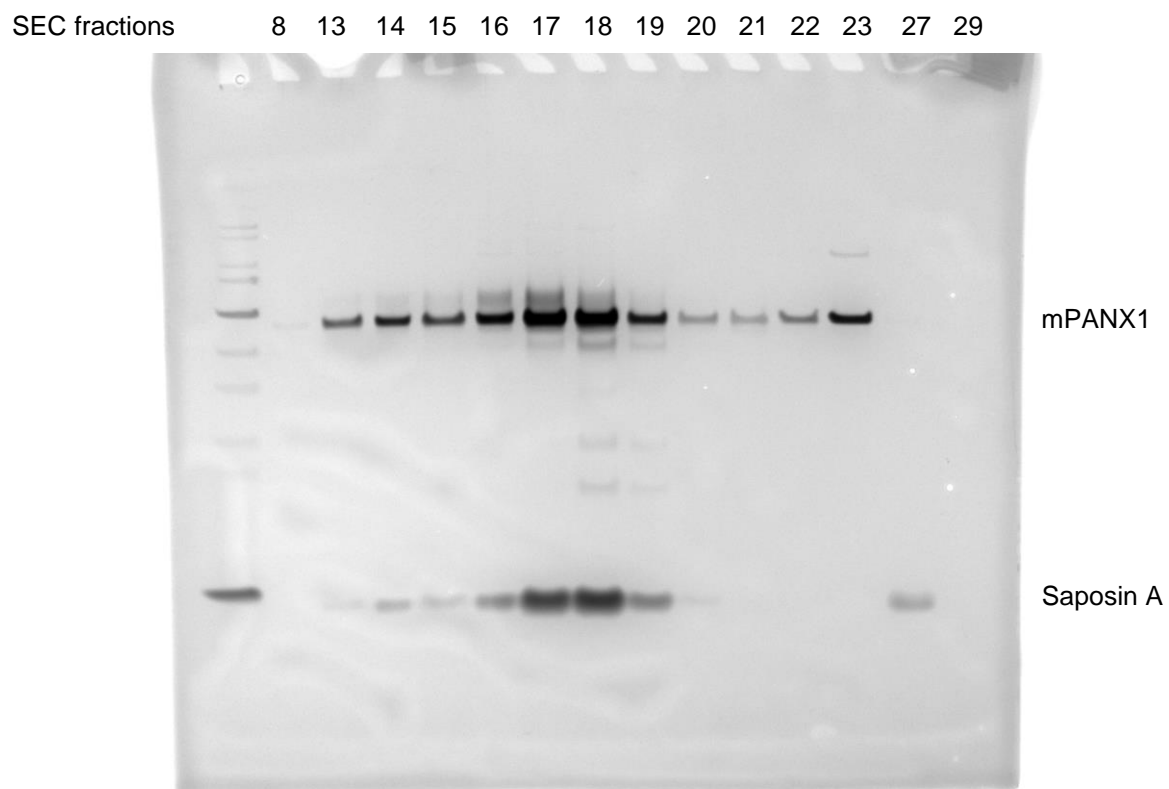

**Supplementary figure 1.** Shows the unprocessed and uncropped SDS-PAGE image presented in Figure 1E.

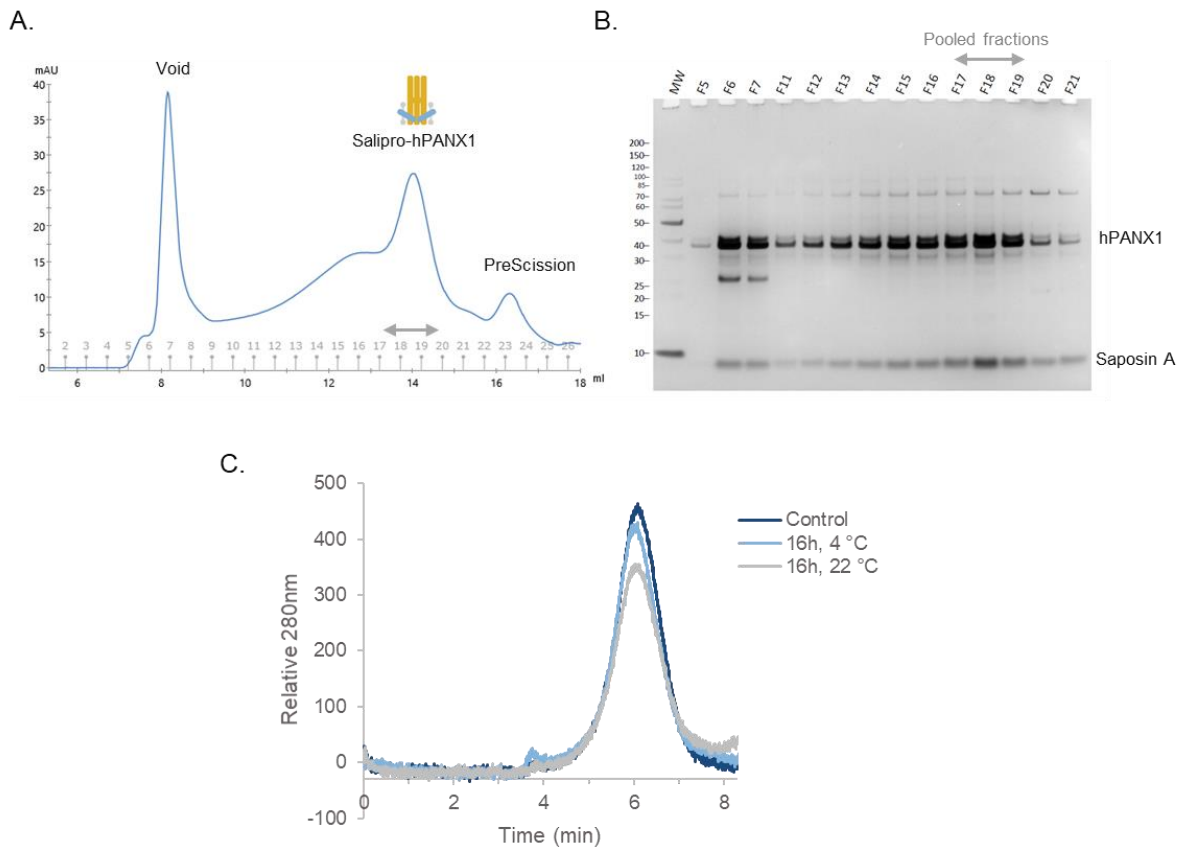

**Supplementary figure 2.** Direct cell extraction of Salipro-hPANX1. The hPANX1-GFP fusion protein was designed to contain c-terminal <sup>10</sup>His/EPEA affinity tags with a PreScission protease cleavage site upstream of GFP (hPANX1-PreScission-GFP-<sup>10</sup>His/EPEA). Protein purification was achieved using C-tag affinity purification resin binding to the EPEA tag, followed by on-column PreScission cleavage. (A) Eluted Salipro-hPANX1 particles were concentrated by ultrafiltration and further purified by preparative SEC. (B) Collected SEC fractions were analysed by reducing SDS-PAGE using protein silver staining confirming the sole presence of hPANX1 and saposin A making up the Salipro-hPANX1 nanoparticles. SEC peak fractions 17-20 were pooled, concentrated and flash frozen in liquid nitrogen for -80 °C storage. (C) To evaluate Salipro-hPANX1 stability, particles were thawed and incubated for either 16h at 4 °C or at 22 °C followed by analytic SEC. The control sample was analyzed immediately after freeze-thawing without any further incubation.

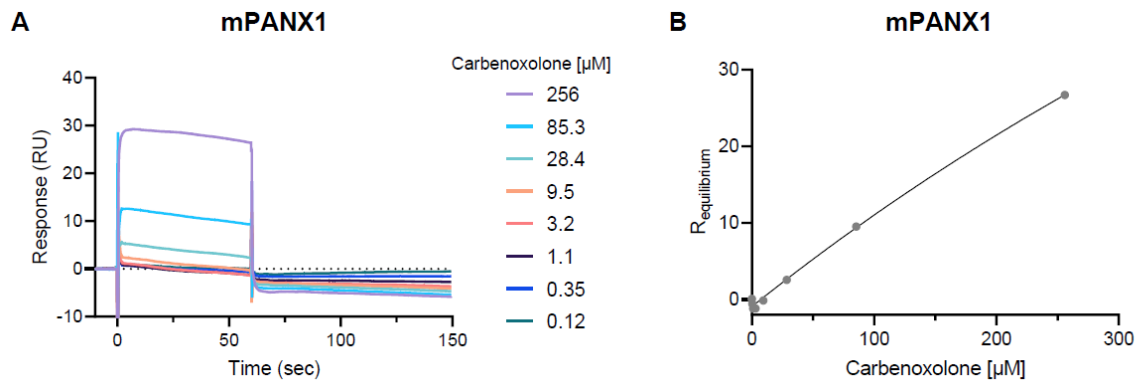

**Supplementary figure 3.** SPR analysis of His-Salipro-mPANX1 particle binding to carbenoxolone (A) Concentration series of carbenoxolone was injected over a His-Salipro-mPANX1 coated surface for 60 seconds followed by a 90 second dissociation time. (B) The equilibrium curve does not have sufficient curvature to accurately determine the  $K_D$ . Data is representative of  $n=3$ .

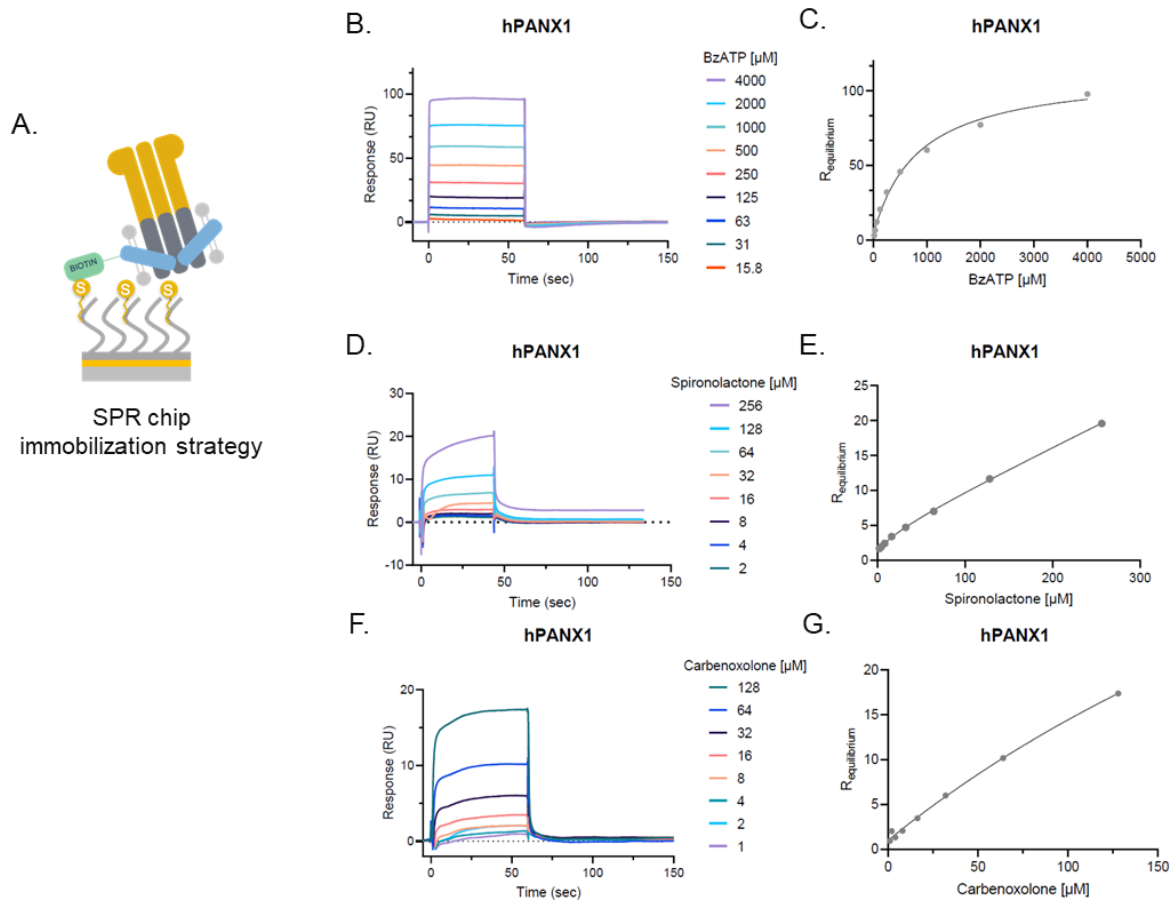

**Supplementary figure 4.** SPR analysis using biotin-Salipro-hPANX1 particle (A) Schematic illustration of biotin-Salipro-hPANX1 nanoparticles immobilization to a sensor chip coated with streptavidin (S). (B) Concentration series of BzATP was injected over a human PANX1 coated surface for 60 seconds followed by a 90 second dissociation time. (C) Equilibrium analysis showed a  $K_D$  of  $837\mu\text{M} \pm 140\mu\text{M}$ . (D) Concentration series of spironolactone was injected over the surface for 45 seconds followed by a 90 second dissociation time. (E) The equilibrium curve does not have sufficient curvature to accurately determine the  $K_D$ . (F) Concentration series of carbenoxolone was injected over a hPANX1 coated surface for 60 seconds followed by a 90 second dissociation time. (G) The equilibrium curve does not have sufficient curvature to accurately determine the  $K_D$ . All data is representative of  $n=3$ .

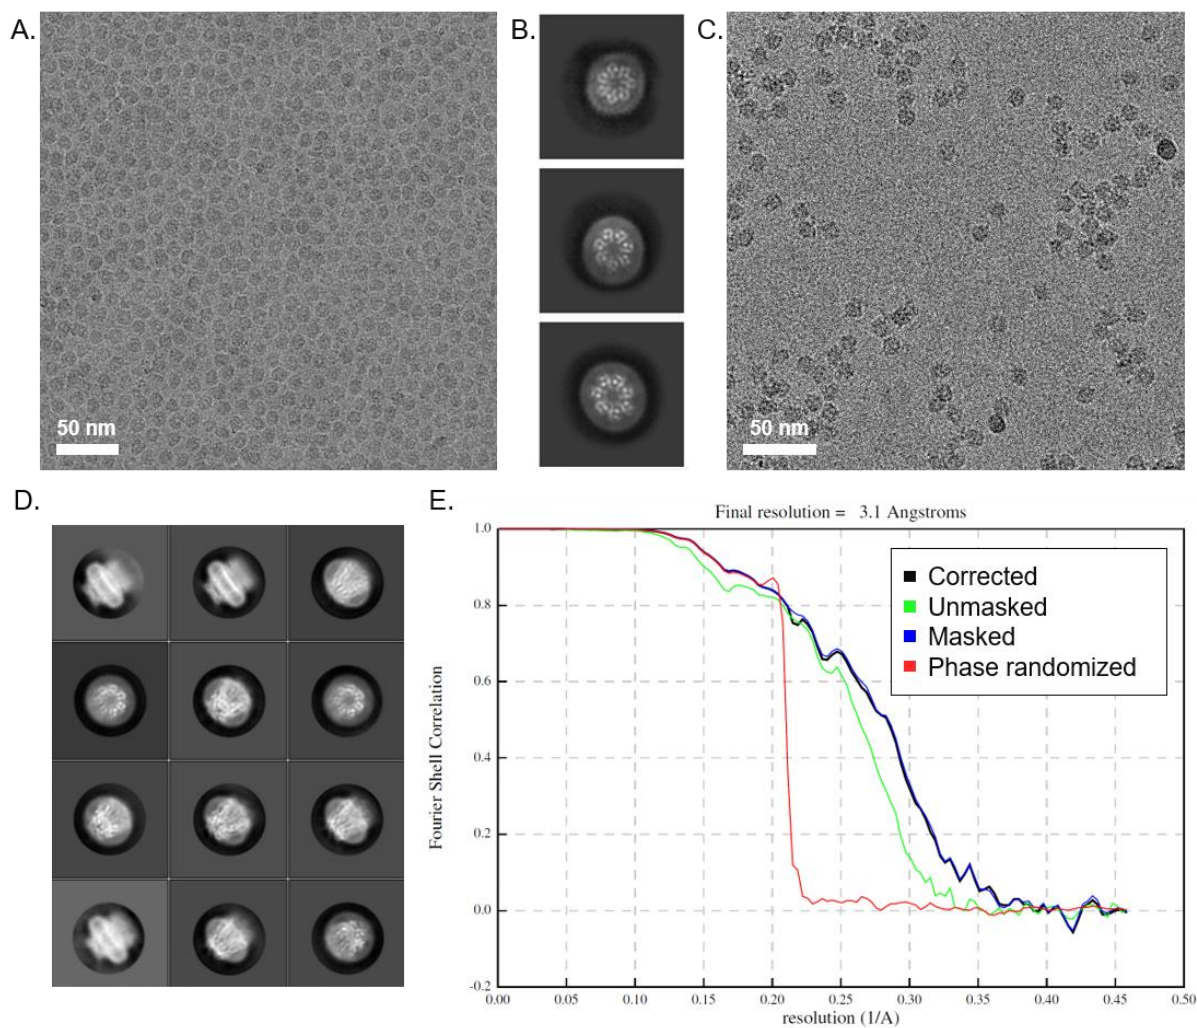

**Supplementary figure 5** - Representative micrographs, 2D class averages and Fourier shell correlation curve for the Salipro-mPANX1 datasets. (A) Representative cryo-EM micrograph and (B) 2D class averages for the dataset without fluorinated Fos-Choline 8. (C) Representative cryo-EM micrograph and (D) 2D class averages for the dataset with 0.5 mM fluorinated Fos-Choline 8. (E) Fourier shell correlation (FSC) curve plot.

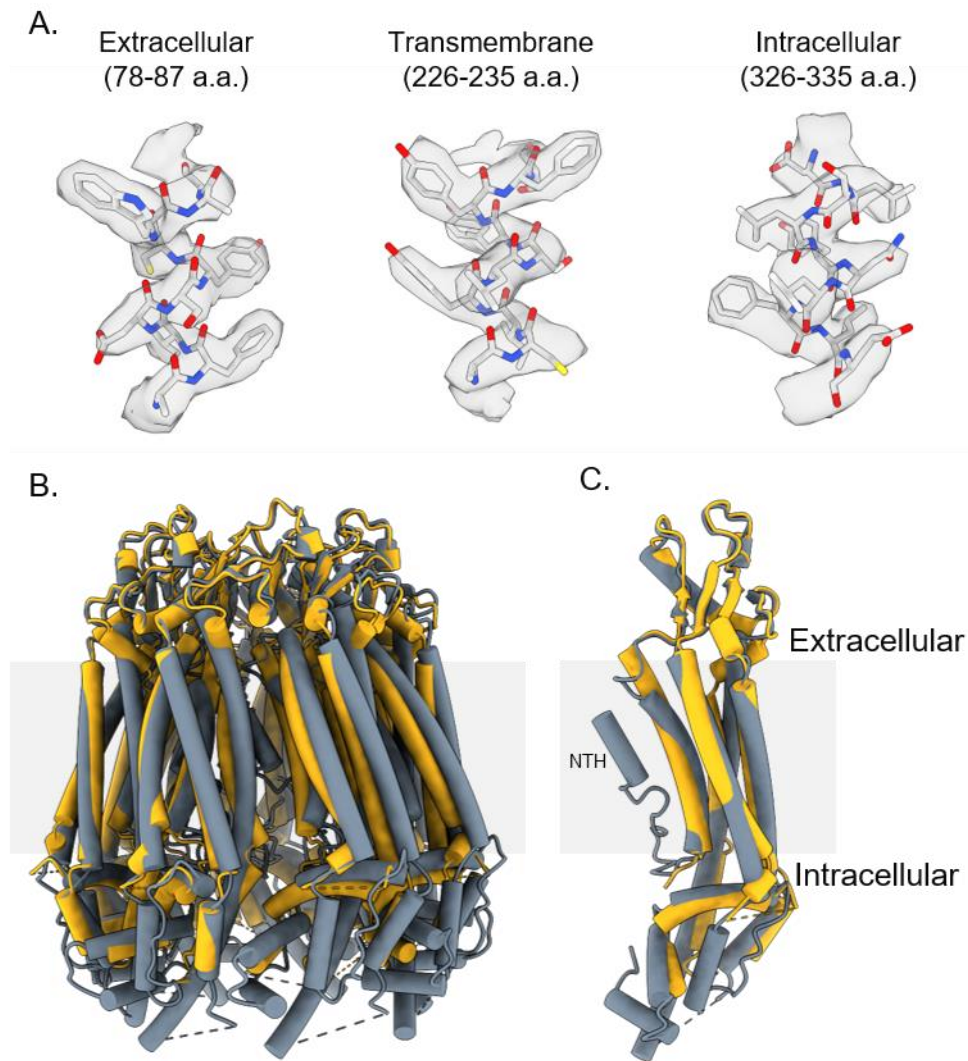

**Supplementary figure 6** – Representative density and comparison to hPANX1 (PDB code 6WBF). (A) Representative density from extracellular, transmembrane and intracellular regions. (B) and (C) Comparison of Salipro-mPANX1 (shown in yellow) heptamer (B) and protomer (C) to hPANX1 (shown in grey). The intra-membrane N-terminal domain (NTH) resolved in the hPANX1 structure, but not in Salipro-mPANX1, is highlighted.

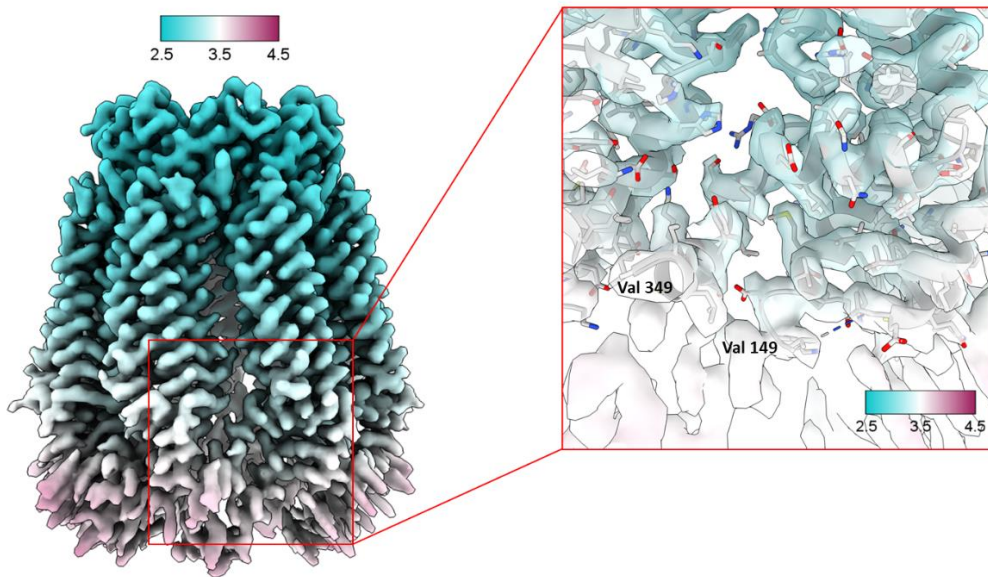

**Supplementary figure 7.** Cryo-EM map of Salipro-mPANX1 coloured according to local resolution. The inset displays the zoomed-in intracellular region with the last modelled residues labelled.

Histogram and Directional FSC Plot for SMP02  
Sphericity = 0.917 out of 1. Global resolution = 3.10 Å.

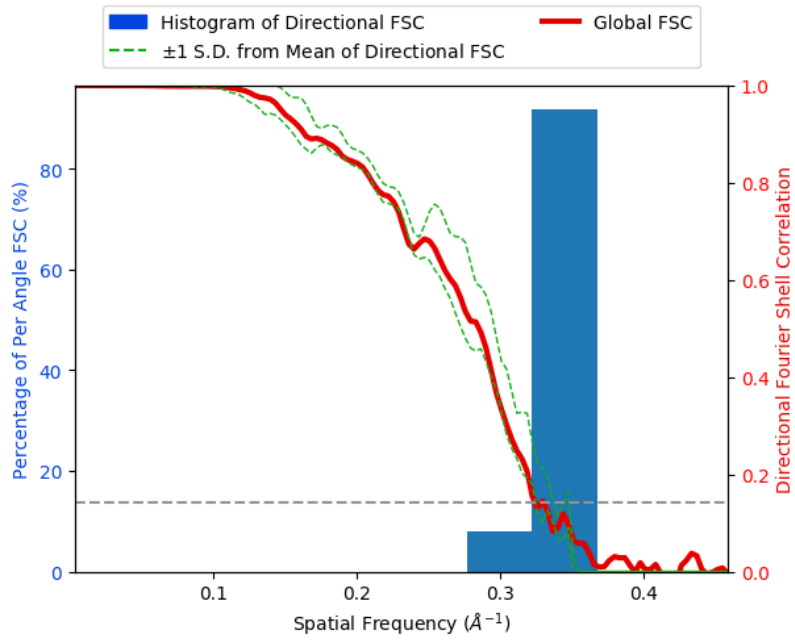

**Supplementary figure 8.** Graph showing the spread of 3D FSC values overlaid on the global half-map FSC curve.



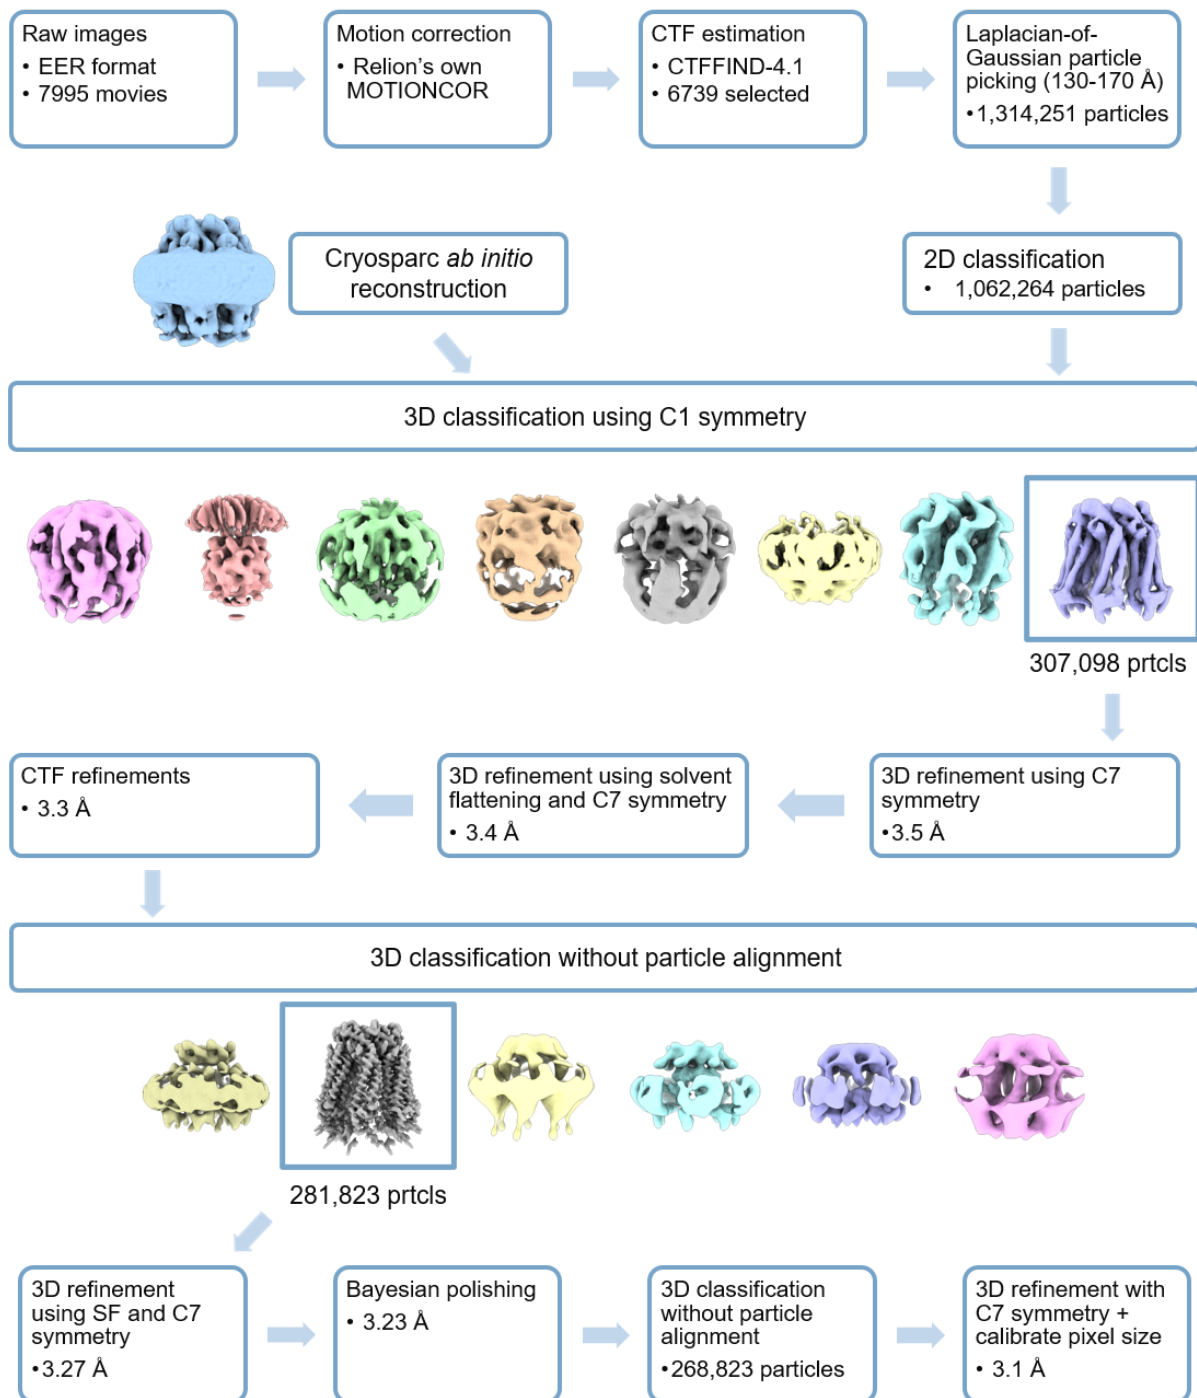

**Supplementary figure 9.** Cryo-EM image processing workflow. A detailed description of the data-analysis pipeline can be found in the Methods.

|                | mPANX1 ( $\mu\text{M}$ ) | hPANX1 ( $\mu\text{M}$ ) |
|----------------|--------------------------|--------------------------|
| BzATP          | $720 \pm 133$            | $837 \pm 140$            |
| Carbenoxolone  | ND                       | ND                       |
| Spironolactone | $160 \pm 10$             | ND                       |

**Supplementary Table 1:** Summary of  $K_D$  values determined from SPR experiments described in Figure 2B-C and Supplementary Figure 3.

|                                                     |                       |
|-----------------------------------------------------|-----------------------|
|                                                     | #1 Salipro-mPANX1     |
|                                                     | (EMDB-15110)          |
|                                                     | (PDB 8A3B)            |
| <b>Data collection and processing</b>               |                       |
| Magnification                                       | 165,000x              |
| Voltage (kV)                                        | 300                   |
| Electron exposure (e <sup>-</sup> /Å <sup>2</sup> ) | 40.24                 |
| Defocus range (μm)                                  | -0.5 to -2            |
| Pixel size (Å)                                      | 0.727                 |
| Symmetry imposed                                    | C7                    |
| Initial particle images (no.)                       | 1,314,251             |
| Final particle images (no.)                         | 268,823               |
| Map resolution (Å)                                  | 3.1                   |
| FSC threshold                                       | 0.143                 |
| Map resolution range (Å)                            | 2.52-5.47             |
| <b>Refinement</b>                                   |                       |
| Initial model used (PDB code)                       | AF-Q9JIP4-F1-model_v2 |
| Model resolution (Å)                                | n/a                   |
| FSC threshold                                       | n/a                   |
| Model resolution range (Å)                          | n/a                   |
| Map sharpening <i>B</i> factor (Å <sup>2</sup> )    | -136.316              |
| Model composition                                   |                       |
| Non-hydrogen atoms                                  | 14448                 |
| Protein residues                                    | 1792                  |
| Ligands                                             | n/a                   |
| <i>B</i> factors (Å <sup>2</sup> )                  |                       |
| Protein                                             | 31.948                |
| Ligand                                              | n/a                   |
| R.m.s. deviations                                   |                       |
| Bond lengths (Å)                                    | 0.015                 |
| Bond angles (°)                                     | 1.507                 |

---

|                   |       |
|-------------------|-------|
| Validation        |       |
| MolProbity score  | 1.36  |
| Clashscore        | 6.56  |
| Poor rotamers (%) | 0     |
| Ramachandran plot |       |
| Favored (%)       | 97.51 |
| Allowed (%)       | 2.49  |
| Disallowed (%)    | 0     |

---

**Supplementary Table 2.** Cryo-EM data collection, refinement, and validation statistics
